# Supplementary material for: Phosphatidylcholine and its relation to apolipoproteins A-1 and B changes after Roux-en-Y gastric bypass: a cohort study
Source: PubMed Central journal article supplement (PMC6729082; doi:10.1186/s12944-019-1111-7), 2019-09-05
Supplement: 12944_2019_1111_MOESM2_ESM.pdf [file 12944_2019_1111_MOESM2_ESM.pdf]

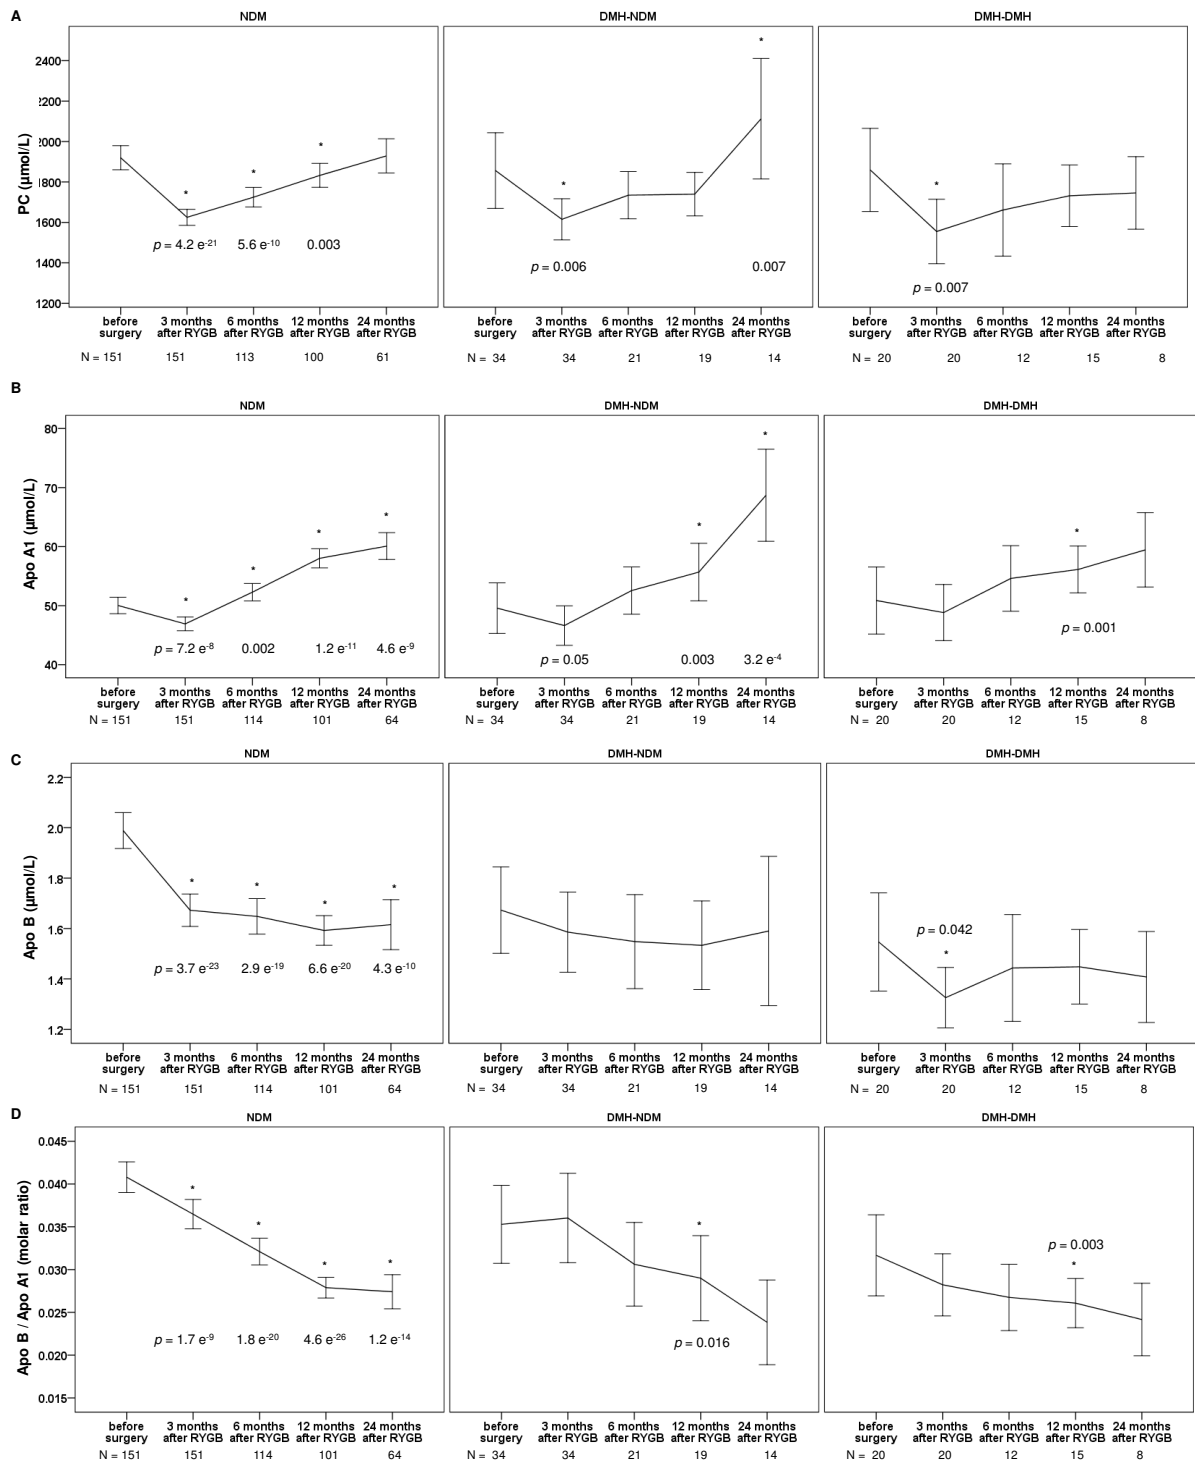

**Supplementary Figure 2.** Changes in (A) PC, (B) Apolipoprotein A1 (Apo A1), (C) Apolipoprotein B (Apo B) and (D) Apo A1 / Apo B molar ratio at 3, 6, 12 and 24 months after Roux-en-y gastric bypass (RYGB) surgery in three patient subgroups: NDM, patients without diabetes mellitus (DM); DMH-NDM, patients with DM in remission after RYGB and DMH-DMH, patients with DM and continued hyperglycemia after RYGB. Data are shown as mean (solid line) with error bars representing a 95 % confidence interval. \* marks a significant different value compared with corresponding preoperative value. P-values from paired t-tests comparing values after RYGB with corresponding values before surgery are shown in each figure, as well as number of patients (N) for whom we have data at each time point.
