# Supplementary material for: Phosphatidylcholine and its relation to apolipoproteins A-1 and B changes after Roux-en-Y gastric bypass: a cohort study
Source: PubMed Central journal article supplement (PMC6729082; doi:10.1186/s12944-019-1111-7), 2019-09-05
Supplement: 12944_2019_1111_MOESM3_ESM.pdf [file 12944_2019_1111_MOESM3_ESM.pdf]

**Supplementary Table 1. Serum levels of phosphatidylcholine, free choline and apolipoprotein A1 & B before and after Roux-en-y gastric bypass surgery**

|                                    | <b>All patients<sup>a</sup> (N=220)</b><br>mean (95 % CI) | <b>NDM (N=151)</b><br>mean (95 % CI) | <b>DMH-NDM (N=34)</b><br>mean (95 % CI) | <b>DMH-DMH (N=20)</b><br>mean (95 % CI) | <b>ANOVA p-value<sup>b</sup></b> |
|------------------------------------|-----------------------------------------------------------|--------------------------------------|-----------------------------------------|-----------------------------------------|----------------------------------|
| <b>Preoperative</b>                |                                                           |                                      |                                         |                                         |                                  |
| Phosphatidylcholine (μmol/L)       | 1903.1 (1849.9 - 1956.3)                                  | 1920.0 (1860.6 - 1979.4)             | 1856.5 (1669.4 - 2043.6)                | 1859.5 (1653.8 - 2065.1)                | 0.628                            |
| Free Choline (μmol/L)              | 31.5 (29.3 - 33.8)                                        | 30.9 (28.3 - 33.5)                   | 32.7 (24.7 - 40.7)                      | 34.8 (26.1 - 43.4)                      | 0.609                            |
| Apolipoprotein A1 (μmol/L)         | 49.97 (48.72 - 51.23)                                     | 50.04 (48.64 - 51.44)                | 49.58 (45.30 - 53.86)                   | 50.87 (45.19 - 56.55)                   | 0.895                            |
| Apolipoprotein B (μmol/L)          | 1.88 (1.81 - 1.94)                                        | 1.99 (1.92 - 2.06)                   | 1.67 (1.50 - 1.84)*                     | 1.55 (1.35 - 1.74)*                     | 3 e <sup>-6</sup>                |
| Apolipoprotein B / A1, molar ratio | 0.039 (0.037 - 0.040)                                     | 0.041 (0.039 - 0.043)                | 0.035 (0.031 - 0.040)*                  | 0.032 (0.027 - 0.036)*                  | 0.001                            |
| <b>3 months after RYGB</b>         |                                                           |                                      |                                         |                                         |                                  |
| Phosphatidylcholine (μmol/L)       | 1615.4 (1579.7 - 1651.0)                                  | 1625.1 (1585.5 - 1664.7)             | 1615.3 (1513.4 - 1717.2)                | 1555.1 (1395.5 - 1714.6)                | 0.678                            |
| Free Choline (μmol/L)              | 22.2 (21.4 - 23.1)                                        | 22.1 (21.1 - 23.0)                   | 23.4 (20.7 - 26.1)                      | 21.6 (18.1 - 25.0)                      | 0.472                            |
| Apolipoprotein A1 (μmol/L)         | 47.05 (46.00 - 48.09)                                     | 46.91(45.74 - 48.07)                 | 46.63 (43.28 - 49.98)                   | 48.83 (44.08 - 53.58)                   | 0.703                            |
| Apolipoprotein B (μmol/L)          | 1.62 (1.56 - 1.67)                                        | 1.67 (1.61 - 1.74)                   | 1.59 (1.43 - 1.74)†                     | 1.33 (1.21 -1.45)* †                    | 2.2 e-5                          |
| Apolipoprotein B / A1, molar ratio | 0.035 (0.034 - 0.037)                                     | 0.037 (0.035 - 0.038)                | 0.036 (0.031 - 0.041)†                  | 0.028 (0.025 - 0.032)* †                | 0.001                            |
| <b>6 months after RYGB</b>         |                                                           |                                      |                                         |                                         |                                  |
| Phosphatidylcholine (μmol/L)       | 1722.8 (1681.2 - 1764.4)                                  | 1724.6 (1676.2 - 1773.1)             | 1734.6 (1614.7 - 1854.5)                | 1661.4 (1421.7 - 1901.2)                | 0.722                            |
| Free Choline (μmol/L)              | 22.74 (21.83 - 23.65)                                     | 22.52 (21.57 - 23.47)                | 22.76 ( 20.07 - 25.45)                  | 22.50 (19.87 - 25.13)                   | 0.980                            |
| Apolipoprotein A1 (μmol/L)         | 52.43 (51.17 - 53.70)                                     | 52.28 (50.80 - 53.77)                | 52.56 (48.45 - 56.67)                   | 54.62 (48.78 - 60.46)                   | 0.647                            |
| Apolipoprotein B (μmol/L)          | 1.61 (1.55 - 1.67)                                        | 1.65 (1.58 - 1.72)                   | 1.55 (1.36 - 1.74)                      | 1.44 (1.22 - 1.67)                      | 0.148                            |
| Apolipoprotein B / A1, molar ratio | 0.031 (0.030 - 0.033)                                     | 0.032 (0.031 - 0.034)                | 0.031 (0.026 - 0.036)                   | 0.027 (0.023 - 0.031)                   | 0.047                            |
| <b>12 months after RYGB</b>        |                                                           |                                      |                                         |                                         |                                  |
| Phosphatidylcholine (μmol/L)       | 1821.0 (1773.7 - 1868.3)                                  | 1832.6 (1773.2 - 1892.1)             | 1739.6 (1628.4 - 1850.8)                | 1731.7 (1575.4 - 1888.1)                | 0.247                            |
| Free Choline (μmol/L)              | 22.68 (21.74 - 23.63)                                     | 22.60 (21.53 - 23.68)                | 22.0 (18.68 - 25.32)                    | 21.67 (19.07 - 24.26)                   | 0.783                            |
| Apolipoprotein A1 (μmol/L)         | 57.51 (56.14 - 58.88)                                     | 58.02 (56.39 - 59.65)                | 55.69 (50.66 - 60.72)                   | 56.13 (52.06 - 60.20)                   | 0.445                            |
| Apolipoprotein B (μmol/L)          | 1.58 (1.53 - 1.63)                                        | 1.59 (1.53 - 1.65)                   | 1.53 (1.35 - 1.71)                      | 1.45 (1.30 - 1.60)                      | 0.214                            |
| Apolipoprotein B / A1, molar ratio | 0.028 (0.027 - 0.029)                                     | 0.028 (0.027 - 0.029)                | 0.029 (0.024 - 0.034)                   | 0.026 (0.023 - 0.029)                   | 0.436                            |
| <b>24 months after RYGB</b>        |                                                           |                                      |                                         |                                         |                                  |
| Phosphatidylcholine (μmol/L)       | 1941.4 ( 1862.9 - 2019.9)                                 | 1928.9 (1843.11 - 2014.8)            | 2112.9 (1796.4 - 2429.3)                | 1745.8 (1542.9 - 1948.7)                | 0.078                            |
| Free Choline (μmol/L)              | 22.49 (21.02 - 23.97)                                     | 21.52 (20.08 - 22.95)                | 26.64 (20.62 - 32.67)                   | 24.57 (17.69 - 31.45)                   | 0.187                            |
| Apolipoprotein A1 (μmol/L)         | 61.13 (58.98 - 63.28)                                     | 60.09 (57.79 - 62.39)                | 68.70 (60.42 - 76.98)                   | 59.45 (52.35 - 66.55)                   | 0.134                            |
| Apolipoprotein B (μmol/L)          | 1.60 (1.52 - 1.69)                                        | 1.62 (1.52 - 1.72)                   | 1.59 (1.28 - 1.90)                      | 1.41 (1.20 - 1.61)                      | 0.417                            |
| Apolipoprotein B / A1, molar ratio | 0.027 (0.025 - 0.029)                                     | 0.027 (0.025 - 0.029)                | 0.024 (0.019 - 0.029)                   | 0.024 (0.019 - 0.029)                   | 0.228                            |

Data are reported as mean with a 95 % confidence interval of the mean. CI, confidence interval of the mean; RYGB, Roux-en-y gastric bypass surgery.

NDM, patients without diabetes mellitus (DM); DMH-NDM, patients with DM in remission after Roux-en-y gastric bypass surgery (RYGB);

DMH-DMH, patients with DM not in remission after RYGB. N is the number of patients in the group before surgery and at 3 months follow up.

Numbers at other time points can be found in Figures 1, 3 & 4.

<sup>a</sup>All patients also include 15 patients who belong to other subgroups than the three showed in table;

<sup>b</sup>p-value from One-way ANOVA comparing the three patient subgroup means; Post hoc p-values from Tukey and Games-Howell are not shown in table.

\* indicates significant difference (p < 0,05) when compared to the NDM group.

† indicates significant difference (p < 0,05) when compared to the other subgroup with patients with diabetes (DMH-NDM or DMH-DMH).
