# Supplementary material for: Phosphatidylcholine and its relation to apolipoproteins A-1 and B changes after Roux-en-Y gastric bypass: a cohort study
Source: PubMed Central journal article supplement (PMC6729082; doi:10.1186/s12944-019-1111-7), 2019-09-05
Supplement: 12944_2019_1111_MOESM4_ESM.pdf [file 12944_2019_1111_MOESM4_ESM.pdf]

**Supplementary Table 2. Differences in Apo A1 and Apo B concentrations between female and male patients before and after Roux-en-y gastric bypass.**

|                                   | Female patients |                       | Male patients |                       | <i>p</i> -value    |
|-----------------------------------|-----------------|-----------------------|---------------|-----------------------|--------------------|
|                                   | N               | Mean (95 % CI)        | N             | Mean (95 % CI)        |                    |
| <b>Apolipoprotein A1 (μmol/L)</b> |                 |                       |               |                       |                    |
| Before surgery                    | 150             | 51.89 (50.25 – 53.53) | 70            | 45.86 (44.43 – 47.28) | 1.1e <sup>-7</sup> |
| 3 months after RYGB               | 150             | 48.55 (47.24 – 49.87) | 70            | 43.82 (42.34 – 45.30) | 4e <sup>-6</sup>   |
| 6 months after RYGB               | 115             | 53.70 (52.19 – 55.20) | 44            | 49.13 (47.00 – 51.26) | 0.001              |
| 12 months after RYGB              | 103             | 59.05 (57.48 – 60.62) | 45            | 53.98 (51.49 – 56.47) | 0.001              |
| 24 months after RYGB              | 66              | 61.94 (59.60 – 64.27) | 26            | 59.08 (54.10 – 64.06) | 0.237              |
|                                   |                 |                       |               |                       |                    |
| <b>Apolipoprotein B (μmol/L)</b>  |                 |                       |               |                       |                    |
| Before surgery                    | 150             | 1.92 (1.85 – 2.00)    | 70            | 1.78 (1.67 – 1.90)    | 0.041              |
| 3 months after RYGB               | 150             | 1.66 (1.59 – 1.72)    | 70            | 1.53 (1.44 – 1.63)    | 0.043              |
| 6 months after RYGB               | 115             | 1.64 (1.57 – 1.71)    | 44            | 1.53 (1.43 – 1.63)    | 0.096              |
| 12 months after RYGB              | 103             | 1.60 (1.55 – 1.66)    | 45            | 1.52 (1.41 – 1.62)    | 0.110              |
| 24 months after RYGB              | 66              | 1.59 (1.51 – 1.68)    | 26            | 1.63 (1.41 – 1.86)    | 0.731              |

Data are reported as mean with a 95 % confidence interval. CI, confidence interval of the mean; RYGB, Roux-en-y gastric bypass.
