# Supplementary material for: Phosphatidylcholine and its relation to apolipoproteins A-1 and B changes after Roux-en-Y gastric bypass: a cohort study
Source: PubMed Central journal article supplement (PMC6729082; doi:10.1186/s12944-019-1111-7), 2019-09-05
Supplement: 12944_2019_1111_MOESM5_ESM.pdf [file 12944_2019_1111_MOESM5_ESM.pdf]

**Supplementary Table 3. Lipid- and lipoprotein concentrations before and after Roux-en-y gastric bypass surgery for patients with and without diabetes, in treatment or in no treatment with statin**

| HbA1c before surgery         | < 48 mmol/mol<br>n = 165 |     |                       |                       |         | > 48 mmol/mol<br>n = 55 |    |                       |                       |         |
|------------------------------|--------------------------|-----|-----------------------|-----------------------|---------|-------------------------|----|-----------------------|-----------------------|---------|
|                              | n                        |     | statin (+)            | no statin (-)         | p-value | n                       |    | statin (+)            | no statin (-)         | p-value |
|                              | +                        | -   | mean (95 % CI)        |                       |         | +                       | -  | mean (95 % CI)        |                       |         |
| <b>before surgery</b>        |                          |     |                       |                       |         |                         |    |                       |                       |         |
| Total-cholesterol (mmol/L)   | 18                       | 142 | 5.18 (4.36 - 6.01)    | 4.88 (4.74 - 5.02)    | 0.45    | 31                      | 23 | 3.98 (3.66 - 4.31)    | 4.55 (3.98 - 5.12)    | 0.084   |
| LDL-cholesterol (mmol/L)     | 18                       | 141 | 3.16 (2.39 - 3.94)    | 3.04 (2.92 - 3.16)    | 0.753   | 28                      | 23 | 2.01 (1.70 - 2.32)    | 2.69 (2.20 - 3.18)    | 0.02 ↓  |
| Triglycerides (mmol/L)       | 18                       | 142 | 1.93 (1.58 - 2.27)    | 1.46 (1.34 - 1.58)    | 0.011 ↑ | 31                      | 23 | 2.46 (1.68 - 3.24)    | 1.69 (1.37 - 2.00)    | 0.067   |
| Phosphatidylcholine (μmol/L) | 18                       | 147 | 2038 (1823 - 2252)    | 1902 (1844 - 1959)    | 0.135   | 31                      | 24 | 1878 (1672 - 2085)    | 1844 (1673 - 2014)    | 0.799   |
| Apolipoprotein A1            | 18                       | 147 | 51.41 (46.09 - 56.72) | 49.80 (48.46 - 51.13) | 0.449   | 31                      | 24 | 50.73 (46.78 - 54.67) | 49.01 (43.25 - 54.78) | 0.605   |
| Apolipoprotein B             | 18                       | 147 | 2.04 (1.69 - 2.40)    | 1.95 (1.89 - 2.02)    | 0.608   | 31                      | 24 | 1.51 (1.38 - 1.65)    | 1.77 (1.54 - 1.99)    | 0.053   |
| Apolipoprotein B/A1          | 18                       | 147 | 0.040 (0.039 - 0.042) | 0.040 (0.039 - 0.042) | 0.679   | 31                      | 24 | 0.031 (0.028 - 0.034) | 0.038 (0.032 - 0.044) | 0.045 ↓ |
| <b>3 months after RYGB</b>   |                          |     |                       |                       |         |                         |    |                       |                       |         |
| Total-cholesterol (mmol/L)   | 9                        | 156 | 3.57 (3.02 - 4.11)    | 4.03 (3.90 - 4.15)    | 0.085   | 18                      | 37 | 3.31 (2.99 - 3.62)    | 3.87 (3.54 - 4.20)    | 0.014 ↓ |
| LDL-cholesterol (mmol/L)     | 9                        | 156 | 1.82 (1.32 - 2.32)    | 2.36 (2.25 - 2.47)    | 0.026 ↓ | 18                      | 37 | 1.56 (1.35 - 1.78)    | 2.17 (1.87 - 2.47)    | 0.001 ↓ |
| Triglycerides (mmol/L)       | 9                        | 156 | 1.14 (0.84 - 1.44)    | 1.07 (1.02 - 1.13)    | 0.55    | 18                      | 37 | 1.43 (1.03 - 1.82)    | 1.18 (1.02 - 1.34)    | 0.158   |
| Phosphatidylcholine (μmol/L) | 9                        | 155 | 1661 (1486 - 1835)    | 1613 (1574 - 1652)    | 0.573   | 18                      | 37 | 1605 (1426 - 1783)    | 1611 (1505 - 1717)    | 0.945   |
| Apolipoprotein A1            | 9                        | 156 | 50.09 (43.59 - 56.58) | 46.71 (45.58 - 47.83) | 0.171   | 18                      | 37 | 49.59 (44.60 - 54.59) | 46.51 (43.34 - 49.68) | 0.272   |
| Apolipoprotein B             | 9                        | 156 | 1.42 (1.16 - 1.69)    | 1.67 (1.60 - 1.73)    | 0.077   | 18                      | 37 | 1.34 (1.20 - 1.48)    | 1.59 (1.43 - 1.74)    | 0.016 ↓ |
| Apolipoprotein B/A1          | 9                        | 156 | 0.541 (0.394 - 0.688) | 0.667 (0.637 - 0.698) | 0.058   | 18                      | 37 | 0.028 (0.024 - 0.032) | 0.036 (0.031 - 0.041) | 0.015 ↓ |
| <b>6 months after RYGB</b>   |                          |     |                       |                       |         |                         |    |                       |                       |         |
| Total-cholesterol (mmol/L)   | 8                        | 87  | 4.55 (3.40 - 5.70)    | 4.12 (3.98 - 4.27)    | 0.415   | 15                      | 21 | 3.63 (3.23 - 4.04)    | 4.18 (3.78 - 4.58)    | 0.06 ↓  |
| LDL-cholesterol (mmol/L)     | 8                        | 87  | 2.65 (1.71 - 3.59)    | 2.3 (2.18 - 2.43)     | 0.419   | 15                      | 21 | 1.66 (1.23 - 2.09)    | 2.31 (1.92 - 2.71)    | 0.025 ↓ |
| Triglycerides (mmol/L)       | 8                        | 87  | 1.18 (0.70 - 1.66)    | 0.98 (0.89 - 1.06)    | 0.174   | 15                      | 21 | 1.18 (0.92 - 1.45)    | 1.16 (0.98 - 1.35)    | 0.879   |
| Phosphatidylcholine (μmol/L) | 7                        | 117 | 1680 (1454 - 1906)    | 1726 (1680 - 1773)    | 0.64    | 14                      | 20 | 1624 (1465 - 1782)    | 1788 (1637 - 1938)    | 0.13    |
| Apolipoprotein A1            | 7                        | 118 | 55.46 (47.59 - 63.33) | 51.96 (50.54 - 53.39) | 0.256   | 14                      | 20 | 55.31 (50.43 - 60.18) | 52.13 (47.84 - 56.42) | 0.312   |
| Apolipoprotein B             | 7                        | 118 | 1.61 (1.23 - 1.99)    | 1.64 (1.57 - 1.70)    | 0.840   | 14                      | 20 | 1.40 (1.20 - 1.60)    | 1.59 (1.40 - 1.78)    | 0.157   |
| Apolipoprotein B/A1          | 7                        | 118 | 0.029 (0.024 - 0.034) | 0.032 (0.031 - 0.034) | 0.267   | 14                      | 20 | 0.026 (0.021 - 0.031) | 0.031 (0.027 - 0.036) | 0.100   |
| <b>12 months after RYGB</b>  |                          |     |                       |                       |         |                         |    |                       |                       |         |
| Total-cholesterol (mmol/L)   | 7                        | 136 | 4.47 (3.97 - 4.97)    | 4.16 (4.04 - 4.28)    | 0.243   | 12                      | 35 | 3.58 (3.13 - 4.02)    | 4.03 (3.77 - 4.28)    | 0.072   |
| LDL-cholesterol (mmol/L)     | 7                        | 136 | 2.41 (1.80 - 3.03)    | 2.2 (2.11 - 2.29)     | 0.312   | 12                      | 35 | 1.56 (1.27 - 1.85)    | 2.07 (1.86 - 2.29)    | 0.011 ↓ |
| Triglycerides (mmol/L)       | 7                        | 136 | 1.05 (0.60 - 1.50)    | 0.95 (0.90 - 1.01)    | 0.463   | 12                      | 35 | 0.99 (0.71 - 1.27)    | 1.14 (0.95 - 1.34)    | 0.405   |
| Phosphatidylcholine (μmol/L) | 8                        | 104 | 2006 (1789 - 2222)    | 1830 (1773 - 1888)    | 0.106   | 10                      | 25 | 1823 (1564 - 2082)    | 1723 (1634 - 1811)    | 0.428   |
| Apolipoprotein A1            | 8                        | 105 | 58.23 (50.24 - 66.21) | 57.99 (56.40 - 59.57) | 0.937   | 10                      | 25 | 59.66 (53.38 - 65.94) | 54.41 (50.81 - 58.01) | 0.118   |
| Apolipoprotein B             | 8                        | 105 | 1.71 (1.38 - 2.04)    | 1.59 (1.54 - 1.65)    | 0.295   | 10                      | 25 | 1.45 (1.17 - 1.72)    | 1.53 (1.40 - 1.65)    | 0.531   |
| Apolipoprotein B/A1          | 8                        | 105 | 0.031 (0.022 - 0.040) | 0.028 (0.027 - 0.029) | 0.504   | 10                      | 25 | 0.024 (0.020 - 0.028) | 0.029 (0.025 - 0.033) | 0.132   |

Data are reported as mean (95 % CI); +, statin treatment; -, no statin treatment; significant higher or lower values in the statin group compared to the group with no statin treatment is marked with ↑ and ↓, respectively.
